# Supplementary material for: Irreversible Antagonists for the Adenosine A2B Receptor
Source: Molecules. 2022 Jun 13;27(12):3792. doi: 10.3390/molecules27123792 (PMC9231011; doi:10.3390/molecules27123792)
Supplement: Supplementary file 1 [file molecules-27-03792-s001.zip › molecules-1760172-supplementary.pdf]

# Supporting Information

## Irreversible antagonists for the adenosine A<sub>2B</sub> receptor

Ahmed Temirak,<sup>1&</sup> Jonathan G. Schlegel,<sup>1&</sup> Jan H. Voss,<sup>1</sup> Victoria J. Vaaßen,<sup>1</sup> Christin Vielmuth,<sup>1</sup> Tobias Claff,<sup>1</sup> and Christa E. Müller<sup>1,\*</sup>

<sup>1</sup>PharmaCenter Bonn, Pharmaceutical Institute, Department of Pharmaceutical & Medicinal Chemistry, University of Bonn, An der Immenburg 4, D-53121 Bonn, Germany

<sup>&</sup>Equal contribution

\*Correspondence: [christa.mueller@uni-bonn.de](mailto:christa.mueller@uni-bonn.de)

### Table of contents

|                                                                                              |         |
|----------------------------------------------------------------------------------------------|---------|
| Preparation of key intermediates <b>2a–c</b> , <b>3a–c</b> , <b>5a–c</b> , <b>9–11</b> ..... | S2–S6   |
| NMR data for compounds <b>6a–c</b> and <b>12</b> .....                                       | S7–S10  |
| LC/MS data for compounds <b>6a–c</b> and <b>12</b> .....                                     | S11–S18 |

**6-Amino-5-nitroso-3-propyl-1H-pyrimidine-2,4-dione (2a)** [30]. This compound was synthesized according to general procedure A. A yellow precipitate was obtained in a yield of 90% (890 mg). <sup>1</sup>H NMR (500 MHz, DMSO-*d*<sub>6</sub>) δ 11.37 (s, 1H, NH uracil), 3.81-3.75 (t, *J* = 6.2 Hz, 2H, CH<sub>2</sub> propyl), 1.63-1.54 (m, 2H, CH<sub>2</sub> propyl), 0.88 (t, *J* = 7.5 Hz, 3H, CH<sub>3</sub> propyl). <sup>13</sup>C NMR (126 MHz, DMSO-*d*<sub>6</sub>) δ 161.7, 150.8, 146.3, 140.1, 41.4, 21.0, 11.3. HPLC-UV (254 nm) ESI-MS, purity: 97.5%. LC-MS positive mode (*m/z*): 199.2 [M + H]<sup>+</sup>.

**6-Amino-1-methyl-5-nitroso-3-propylpyrimidine-2,4(1H,3H)-dione (2b)** [43]. This compound was synthesized according to general procedure A. A violet precipitate was obtained in a yield of 94% (990 mg). <sup>1</sup>H NMR (500 MHz, DMSO-*d*<sub>6</sub>) δ 3.88-3.82 (m, 2H, CH<sub>2</sub> propyl), 3.23 (d, *J* = 25.8 Hz, 3H, CH<sub>3</sub>), 1.66-1.55 (m, 2H, CH<sub>2</sub> propyl), 0.89 (t, *J* = 7.4 Hz, 3H, CH<sub>3</sub> propyl). <sup>13</sup>C NMR (126 MHz, DMSO-*d*<sub>6</sub>) δ: 160.1, 149.3, 146.3, 139.3, 42.5, 28.7, 20.8, 11.3. HPLC-UV (254 nm) ESI-MS, purity: 99.1%. LC-MS positive mode (*m/z*): 212.1 [M + H]<sup>+</sup>.

**6-Amino-1-cyclopropyl-5-nitroso-3-propylpyrimidine-2,4(1H,3H)-dione (2c)**. This compound was synthesized according to general procedure A. A violet precipitate was obtained in a yield of 81% (965 mg). <sup>1</sup>H NMR (600 MHz, DMSO-*d*<sub>6</sub>) δ 3.84-3.77 (t, *J* = 7.4 Hz, 2H, CH<sub>2</sub> propyl), 2.61 (tt, *J* = 7.0, 3.9 Hz, 1H, CH cyclopropyl), 1.63-1.53 (m, 2H, CH<sub>2</sub> propyl), 1.17-1.10 (m, 2H, CH<sub>2</sub> cyclopropyl), 0.88 (t, *J* = 7.5 Hz, 3H, CH<sub>3</sub> propyl), 0.81-0.77 (m, 2H, CH<sub>2</sub> cyclopropyl). <sup>13</sup>C NMR (151 MHz, DMSO-*d*<sub>6</sub>) δ: 172.1, 160.5, 149.4, 147.4, 139.7, 42.4, 24.4, 20.9, 11.4, 9.5. HPLC-UV (254 nm) ESI-MS, purity: 98.6%. LC-MS positive mode (*m/z*): 238.8 [M + H]<sup>+</sup>.

**5,6-Diamino-3-propyl-1H-pyrimidine-2,4-dione (3a)** [30]. This compound was synthesized according to general procedure B. A white precipitate was obtained in a yield of 68% (750 mg). <sup>1</sup>H NMR (500 MHz, DMSO-*d*<sub>6</sub>) δ 12.54 (s, 1H, NH uracil), 5.55 (s, 2H, NH<sub>2</sub> uracil), 3.67-3.61 (t, *J* = 6.4 Hz, 2H, CH<sub>2</sub> propyl), 1.54-1.45 (m, 2H, CH<sub>2</sub> propyl), 0.82 (t, *J* = 7.6 Hz, 3H, CH<sub>3</sub>

propyl).  $^{13}\text{C}$  NMR (126 MHz,  $\text{DMSO-}d_6$ )  $\delta$  160.4, 151, 149.2, 142.4, 41, 21, 11.4. HPLC-UV (254 nm) ESI-MS, purity: 95.1%. LC-MS positive mode ( $m/z$ ): 185.2  $[\text{M} + \text{H}]^+$ .

**5,6-Diamino-1-methyl-3-propylpyrimidine-2,4(1*H*,3*H*)-dione (3b)** [43]. This compound was synthesized according to general procedure **B**. A white precipitate was obtained in a yield of 77% (918 mg). HPLC-UV (254 nm) ESI-MS, purity: 97.4%. LC-MS positive mode ( $m/z$ ): 198.2  $[\text{M} + \text{H}]^+$ .

**5,6-Diamino-1-cyclopropyl-3-propylpyrimidine-2,4(1*H*,3*H*)-dione (3c)**. This compound was synthesized according to general procedure **B**. A white precipitate was obtained in a yield of 80% (1.07 g).  $^1\text{H}$  NMR (500 MHz,  $\text{DMSO-}d_6$ )  $\delta$  6.02 (s, 2H,  $\text{NH}_2$  xanthine), 3.67 (dd,  $J = 8.2, 6.6$  Hz, 2H,  $\text{CH}_2$  propyl), 2.62 (tt,  $J = 6.9, 3.8$  Hz, 1H,  $\text{CH}$  cyclopropyl), 1.46 (q,  $J = 7.6$  Hz, 2H,  $\text{CH}_2$  propyl), 1.14-1.04 (m, 2H,  $\text{CH}_2$  cyclopropyl), 0.80 (t,  $J = 7.4$  Hz, 3H,  $\text{CH}_3$  propyl), 0.74-0.67 (m, 2H,  $\text{CH}_2$  cyclopropyl).  $^{13}\text{C}$  NMR (126 MHz,  $\text{DMSO-}d_6$ )  $\delta$ : 159.2, 150.1, 145.6, 95.7, 92, 41.8, 25.2, 21, 11.3, 9.9. HPLC-UV (254 nm) ESI-MS, purity: 95.4%. LC-MS positive mode ( $m/z$ ): 224.1  $[\text{M} + \text{H}]^+$ .

**4-((6-Amino-2,4-dioxo-3-propyl-1,2,3,4-tetrahydropyrimidin-5-yl)carbamoyl)benzenesulfonyl fluoride (5a)**. This compound was synthesized according to general procedure **C** using **3a** (1.09 g, 5.9 mmol) and **4** (1.0 g, 4.9 mmol) dissolved in 10 mL DMF, EDC (1.4 g, 7.4 mmol) was added and the reaction mixture was stirred at rt for 2 h. A pale-yellow precipitate was obtained in a yield of 66% (75 mg).  $R_f$  in DCM/methanol (9.5:0.5) = 0.43.  $^1\text{H}$  NMR (500 MHz,  $\text{DMSO-}d_6$ )  $\delta$  10.71 (s, 1H,  $\text{NH}$  uracil), 9.27 (s, 1H,  $\text{NH}$  uracil), 8.26 (d,  $J = 3.2$  Hz, 4H,  $\text{CH}$  phenyl), 6.44 (s, 2H,  $\text{NH}_2$ ), 3.70-3.58 (m, 2H,  $\text{CH}_2$  propyl), 1.59-1.41 (m, 2H,  $\text{CH}_2$  propyl), 0.83 (t,  $J = 7.5$  Hz, 3H,  $\text{CH}_3$  propyl).  $^{13}\text{C}$  NMR (126 MHz,  $\text{DMSO-}d_6$ )  $\delta$  164.9, 162.5, 160.6, 150.9, 149.9, 141.9, 133.6 (d,  $J = 23.4$  Hz), 129.9, 128.4, 86.3, 35.9, 21.1, 11.3. HPLC-UV (254 nm) ESI-MS, purity: 95.1%. LC-MS positive mode ( $m/z$ ): 371.2  $[\text{M} + \text{H}]^+$ .

**4-((6-Amino-1-methyl-2,4-dioxo-3-propyl-1,2,3,4-tetrahydropyrimidin-5-yl)carbamoyl)benzenesulfonyl fluoride (5b).** This compound was synthesized according to general procedure C using **3b** (116 mg, 0.59 mmol) and **4** (100 mg, 0.49 mmol) dissolved in 5 mL DMF, EDC (140 mg, 0.74 mmol) was added and the reaction mixture was stirred at rt for 2 h. A pale-yellow precipitate was obtained in a yield of 73% (136 mg).  $R_f$  in DCM/methanol (9.5:0.5) = 0.65.  $^1\text{H}$  NMR (600 MHz, DMSO- $d_6$ )  $\delta$  9.32 (s, 1H, NH uracil), 8.37-8.20 (m, 4H, CH phenyl), 6.82 (s, 2H, NH<sub>2</sub>), 3.77-3.68 (m, 2H, CH<sub>2</sub> propyl), 3.33 (s, 3H, CH<sub>3</sub>), 1.56-1.46 (m, 2H, CH<sub>2</sub> propyl), 0.88 (t,  $J$  = 7.4 Hz, 3H, CH<sub>3</sub> propyl).  $^{13}\text{C}$  NMR (151 MHz, DMSO- $d_6$ )  $\delta$  165.1, 159.2, 152.5, 142, 133.5 (d,  $J$  = 23.4 Hz), 130, 128.4, 127.7, 125.2, 87, 62.7, 42.1, 30.1, 21, 11.4. HPLC-UV (254 nm) ESI-MS, purity: 95.8%. LC-MS positive mode ( $m/z$ ): 385.1  $[\text{M} + \text{H}]^+$ .

**4-((6-Amino-1-cyclopropyl-2,4-dioxo-3-propyl-1,2,3,4-tetrahydropyrimidin-5-yl)carbamoyl)benzenesulfonyl fluoride (5c).** This compound was synthesized according to general procedure C using **3c** (133 mg, 0.59 mmol) and **4** (100 mg, 0.49 mmol) dissolved in 5 mL DMF, EDC (140 mg, 0.74 mmol) was added and the reaction mixture was stirred at rt for 4 h. A pale-yellow precipitate was obtained in a yield of 70% (136 mg).  $R_f$  in DCM/methanol (9.8:0.2) = 0.36.  $^1\text{H}$  NMR (600 MHz, DMSO- $d_6$ )  $\delta$  9.26 (s, 1H, NH uracil), 8.31-8.21 (m, 4H, CH phenyl), 6.79 (s, 2H, NH<sub>2</sub>), 3.71-3.65 (m, 2H, CH<sub>2</sub> propyl), 2.68 (tt,  $J$  = 7.0, 3.9 Hz, 1H, CH cyclopropyl), 1.52-1.45 (m, 2H, CH<sub>2</sub> propyl), 1.17 (dt,  $J$  = 7.9, 3.8 Hz, 2H, CH<sub>2</sub> cyclopropyl), 0.82 (t,  $J$  = 7.4 Hz, 3H, CH<sub>3</sub> propyl), 0.78-0.73 (m, 2H, CH<sub>2</sub> cyclopropyl).  $^{13}\text{C}$  NMR (151 MHz, DMSO- $d_6$ )  $\delta$  165, 159.4, 153.1, 150.8, 142, 133.6 (d,  $J$  = 23.4 Hz), 131.1, 130, 128.4, 86.7, 41.9, 25.5, 21.1, 11.4, 10.2. HPLC-UV (254 nm) ESI-MS, purity: 97.7%. LC-MS positive mode ( $m/z$ ): 411.2  $[\text{M} + \text{H}]^+$ .

**4-(((4-((tert-Butoxycarbonyl)amino)piperidin-1-yl)sulfonyl)benzoic acid (9) [33].** To a flask containing 4-(chlorosulfonyl)benzoic acid **7** (1.0 g, 4.53 mmol) and *tert*-butyl piperidin-4-ylcarbamate **8** (998 mg, 4.53 mmol) dissolved in 10 mL of dioxane, TEA (1.26 mL, 9.06 mmol)

was added and the reaction mixture was stirred at rt for 36 h. Upon completion of the reaction, solvents were vaporized, 10 mL of distilled water was added and the formed precipitate was collected by filtration. The obtained precipitate was purified by column chromatography using the eluent system petroleum ether/ethyl acetate (7.0:3.0). A white precipitate was obtained in a yield of 70% (1.23 g).  $R_f$  in petroleum ether/ethyl acetate (7.0:3.0) = 0.32.  $^1\text{H}$  NMR (500 MHz, DMSO- $d_6$ )  $\delta$  8.13 (d,  $J$  = 8.2 Hz, 2H, CH phenyl), 7.82 (d,  $J$  = 8.2 Hz, 2H, CH phenyl), 3.48 (dt,  $J$  = 12.9, 4.4 Hz, 3H, CH piperidyl), 3.03 (q,  $J$  = 7.4 Hz, 1H, CH piperidyl), 1.81-1.68 (m, 3H, CH piperidyl), 1.34 (s, 9H, Boc), 1.19 (t,  $J$  = 7.3 Hz, 2H, CH piperidyl).  $^{13}\text{C}$  NMR (126 MHz, DMSO)  $\delta$  167.6, 166.5, 154.9, 140.6, 130.3, 127.8, 127.7, 77.8, 46, 44.7, 30.9, 28.4, 28.4, 8.6. HPLC-UV (254 nm) ESI-MS, purity: 95.4%. LC-MS positive mode (m/z): 383.1 [ $\text{M} - \text{H}$ ] $^-$ .

***tert*-Butyl (1-((4-((6-amino-2,4-dioxo-3-propyl-1,2,3,4-tetrahydropyrimidin-5-yl)carbamoyl)phenyl)sulfonyl)piperidin-4-yl)carbamate (10).** This compound was synthesized according to general procedure C using **3a** (574 mg, 3.12 mmol) and **9** (1.0 g, 2.6 mmol) dissolved in 5 mL DMF, EDC (747 mg, 4.0 mmol) was added and the reaction mixture was stirred at rt for 4 h. A white precipitate was obtained in a yield of 68% (980 mg).  $R_f$  in DCM/methanol (9.8:0.2) = 0.69.  $^1\text{H}$  NMR (500 MHz, DMSO- $d_6$ )  $\delta$  13.95 (s, 1H, NH uracil), 10.45 (s, 1H, NH uracil), 8.22-8.13 (m, 2H, CH phenyl), 7.79 (m, 4H, CH phenyl), 7.58 (m, 2H, CH phenyl), 6.84 (s, 2H,  $\text{NH}_2$ ), 3.90 (s, 1H, CH piperidyl), 3.72-3.60 (m, 2H,  $\text{CH}_2$  propyl), 3.50 (td,  $J$  = 8.7, 4.4 Hz, 4H, CH piperidyl), 1.82-1.70 (m, 4H, CH piperidyl), 1.56-1.46 (m, 2H,  $\text{CH}_2$  propyl), 1.44-1.37 (t, 9H, Boc), 0.83 (t,  $J$  = 7.4 Hz, 3H,  $\text{CH}_3$  propyl).  $^{13}\text{C}$  NMR (126 MHz, DMSO- $d_6$ )  $\delta$  167.6, 165.4, 160.7, 154.9, 150.7, 150.1, 140.6, 138.7, 136.7, 130.3, 129, 127.9, 127.7, 127.2, 86.7, 77.8, 46.2, 44.9, 41.1, 30.9, 28.4, 28.4, 21.1, 11.3. HPLC-UV (254 nm) ESI-MS, purity: 96%. LC-MS positive mode (m/z): 551.4 [ $\text{M} + \text{H}$ ] $^+$ .

***tert*-butyl (1-((4-(2,6-Dioxo-1-propyl-2,3,6,7-tetrahydro-1*H*-purin-8-yl)phenyl)sulfonyl)piperidin-4-yl)carbamate (11).** This compound was synthesized according to general procedure **D** using the carboxamide derivative **10**. A white precipitate was obtained in a yield of 60% (255 mg).  $R_f$  in DCM/methanol (9.0:1.0) = 0.26.  $^1\text{H}$  NMR (500 MHz,  $\text{DMSO-}d_6$ )  $\delta$  13.95 (s, 1H, *NH* xanthine), 11.9 (s, 1H, *NH* xanthine), 8.37-8.26 (m, 2H, *CH* phenyl), 7.83 (d,  $J = 8.5$  Hz, 2H, *CH* phenyl), 6.26 (s, 2H,  $\text{NH}_2$ ), 3.86-3.78 (m, 3H, *CH* piperidyl), 3.70-3.61 (m, 2H,  $\text{CH}_2$  propyl), 3.02 (m, 2H, *CH* piperidyl), 2.02-1.94 (m, 2H, *CH* piperidyl), 1.61-1.56 (m, 2H,  $\text{CH}_2$  propyl), 1.56-1.49 (m, 2H, *CH* piperidyl), 0.87 (t,  $J = 7.4$  Hz, 3H,  $\text{CH}_3$  propyl).  $^{13}\text{C}$  NMR (126 MHz,  $\text{DMSO-}d_6$ )  $\delta$  155.7, 155.5, 151.1, 147.6, 147, 136.3, 133.7, 128.2, 126.9, 46.4, 44.3, 41.6, 34.3, 29.1, 21, 11.3. HPLC-UV (254 nm) ESI-MS, purity: 96.3%. LC-MS positive mode ( $m/z$ ): 433.3  $[\text{M} + \text{H}]^+$ .

<sup>1</sup>H NMR

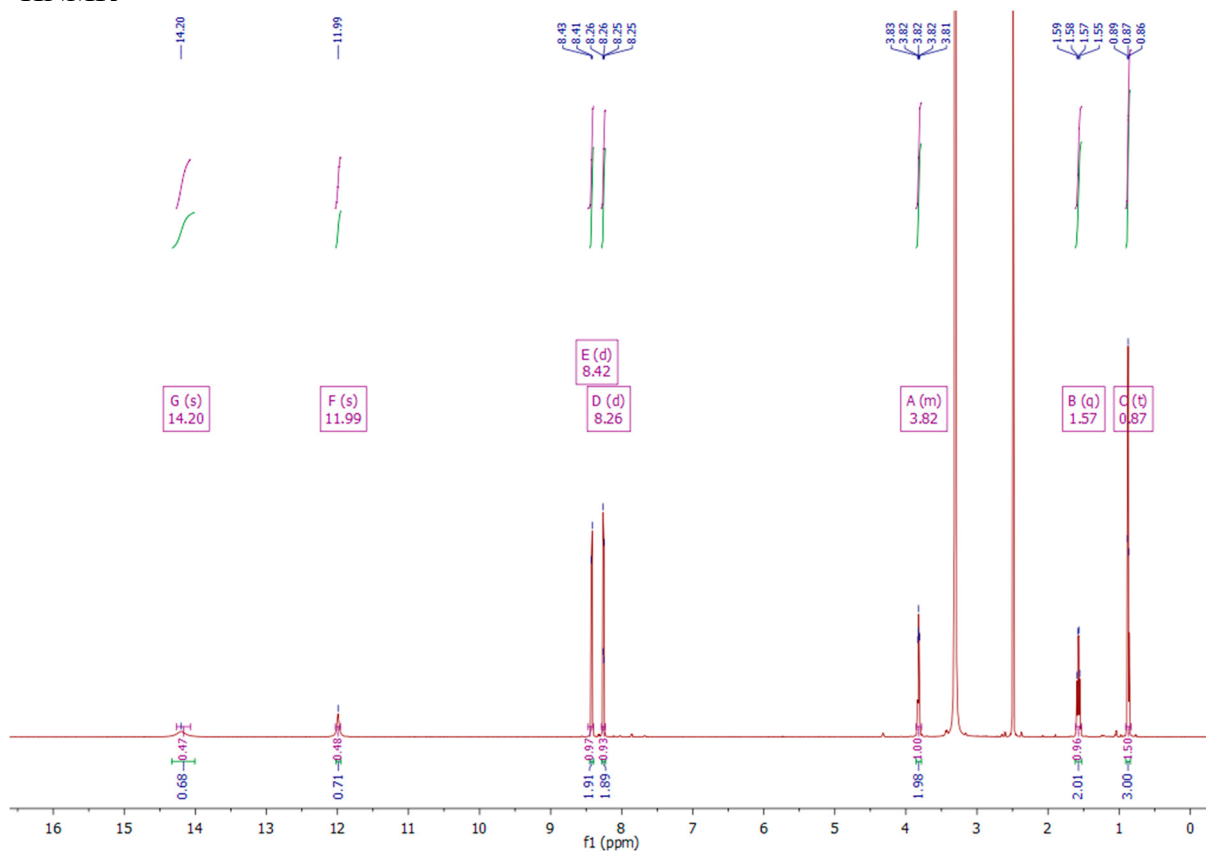

<sup>13</sup>C NMR

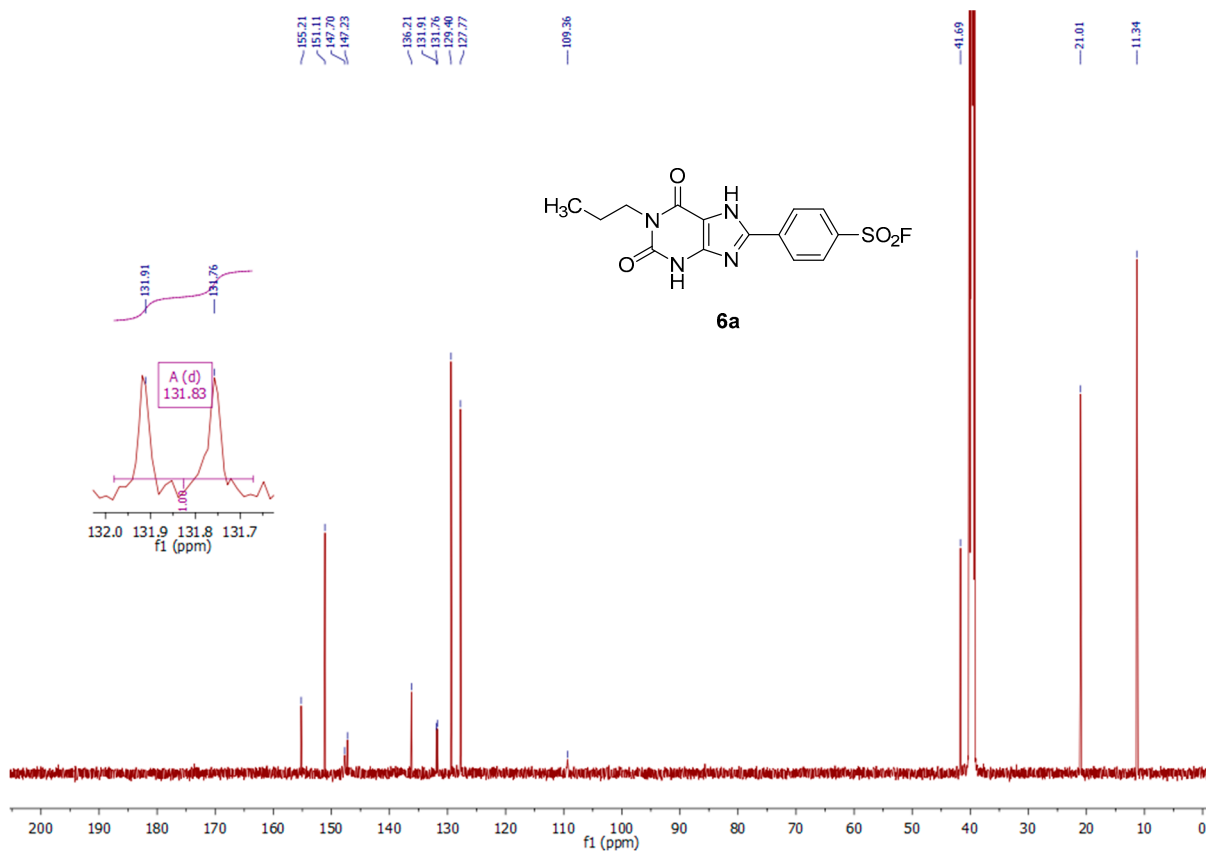

**Figure S1.** <sup>1</sup>H (600 MHz) and <sup>13</sup>C (151 MHz) spectra (DMSO-*d*<sub>6</sub>) of 4-(2,6-dioxo-1-propyl-2,3,6,7-tetrahydro-1*H*-purin-8-yl)benzenesulfonyl fluoride (**6a**).

<sup>1</sup>H NMR

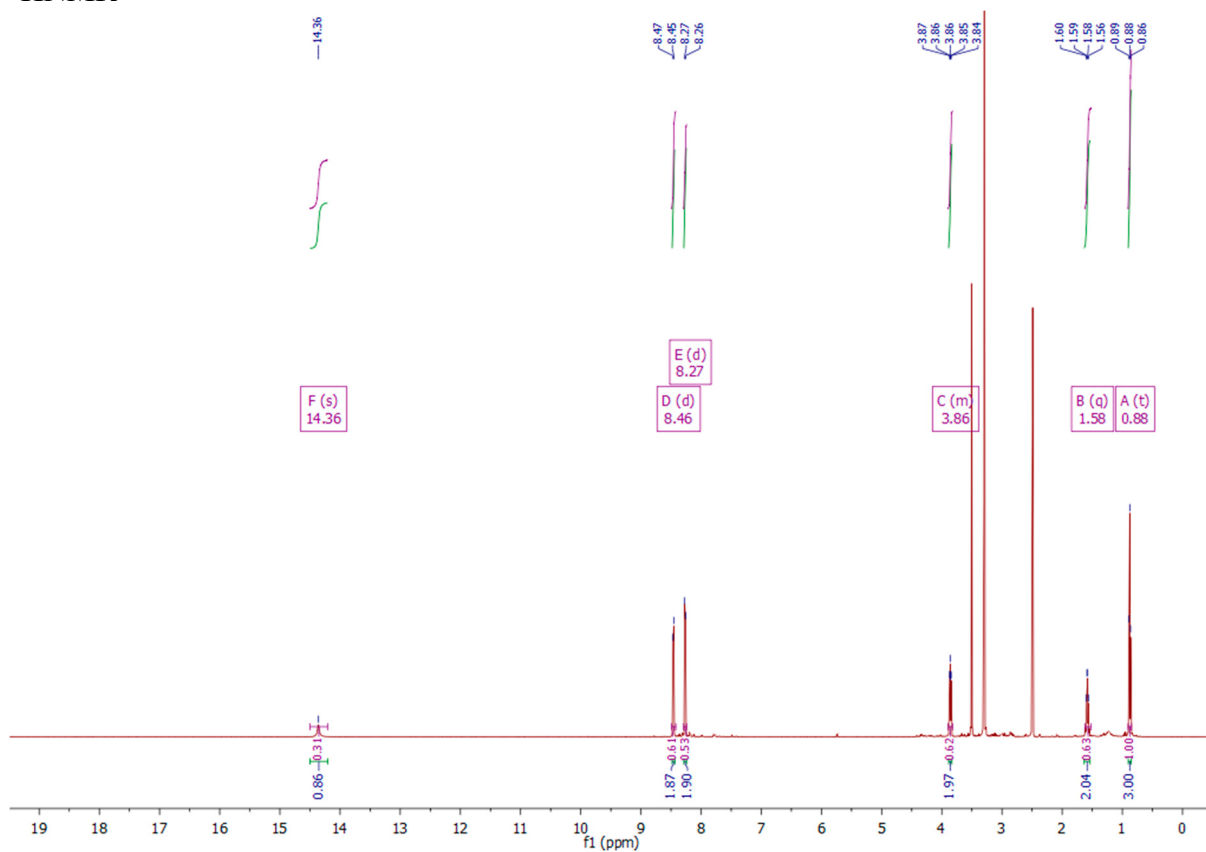

<sup>13</sup>C NMR

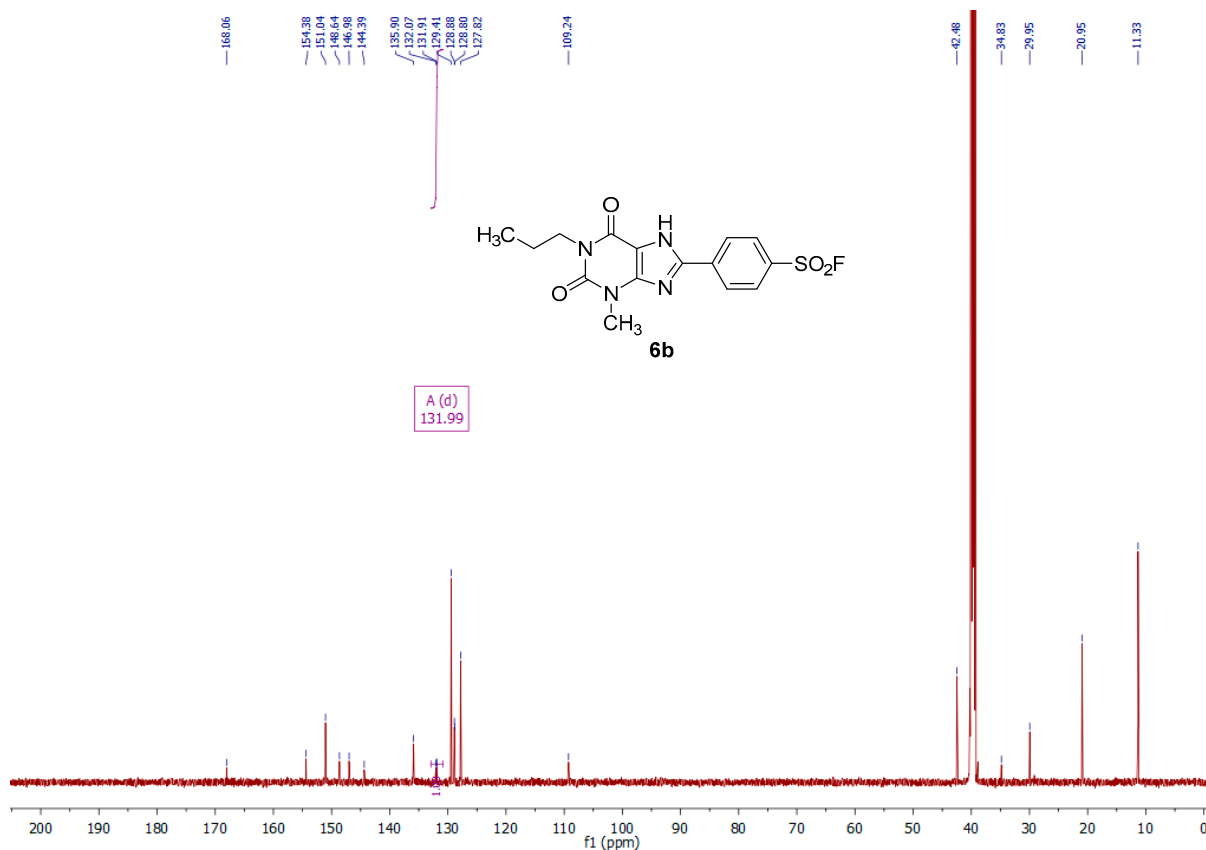

**Figure S2.** <sup>1</sup>H (600 MHz) and <sup>13</sup>C (151 MHz) spectra (DMSO-*d*<sub>6</sub>) of 4-(3-methyl-2,6-dioxo-1-propyl-2,3,6,7-tetrahydro-1*H*-purin-8-yl)benzenesulfonyl fluoride (**6b**).

$^1\text{H}$ NMR

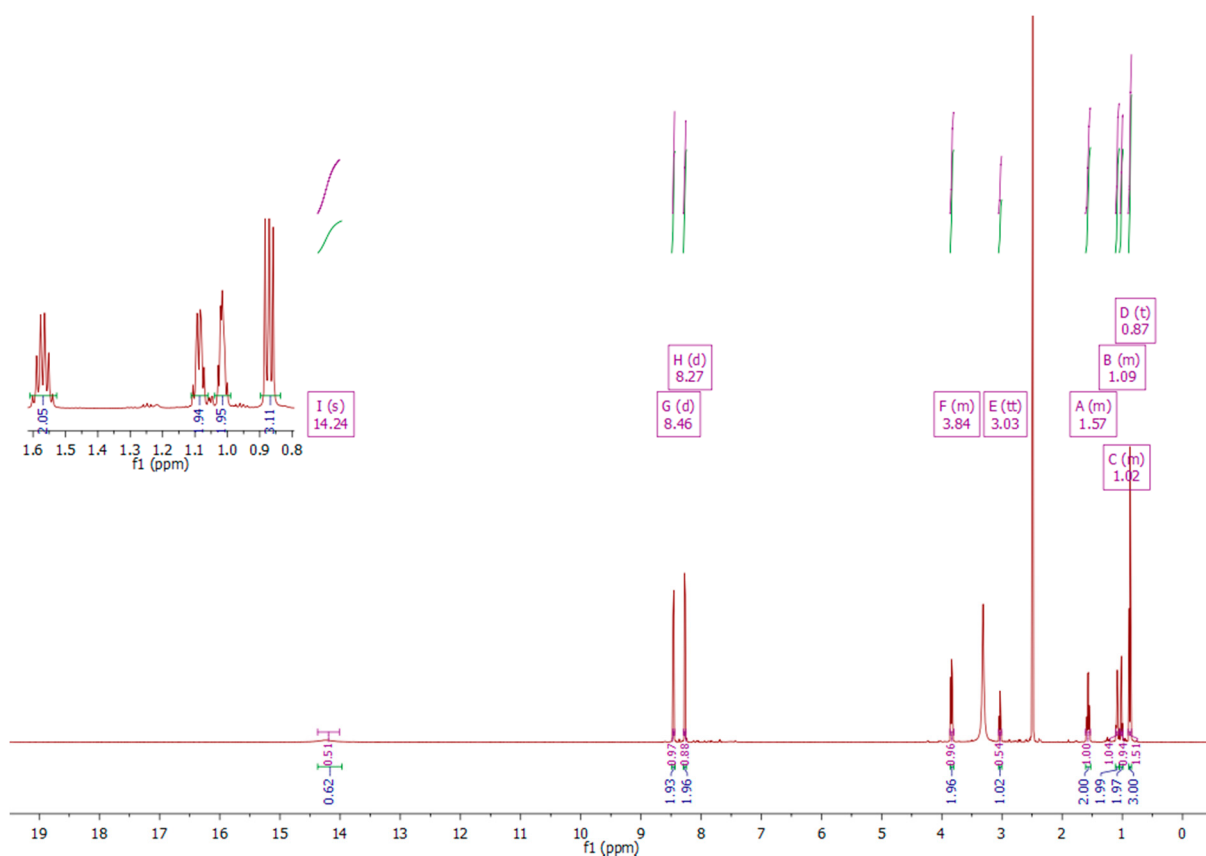

$^{13}\text{C}$ NMR

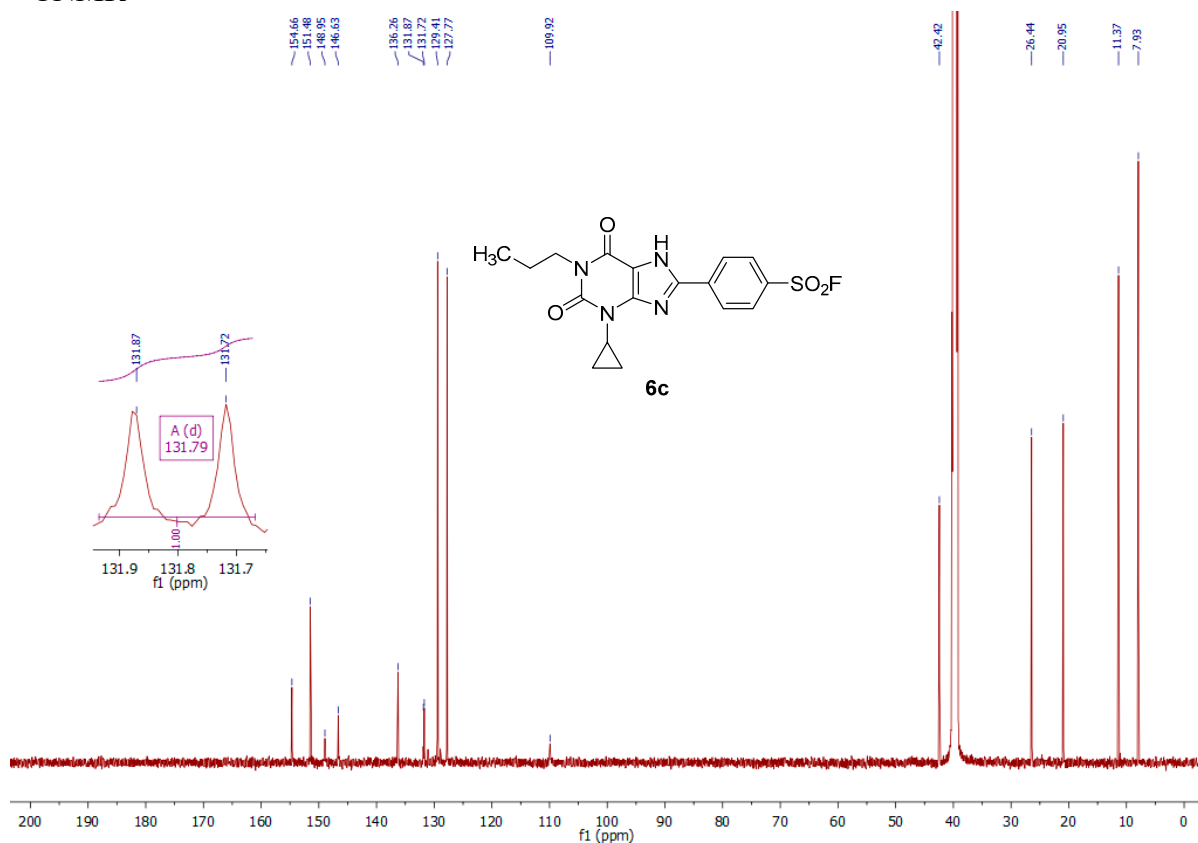

**Figure S3.**  $^1\text{H}$  (600 MHz) and  $^{13}\text{C}$  (151 MHz) spectra ( $\text{DMSO}-d_6$ ) of 4-(3-cyclopropyl-2,6-dioxo-1-propyl-2,3,6,7-tetrahydro-1*H*-purin-8-yl)benzenesulfonyl fluoride (**6c**).

<sup>1</sup>H NMR

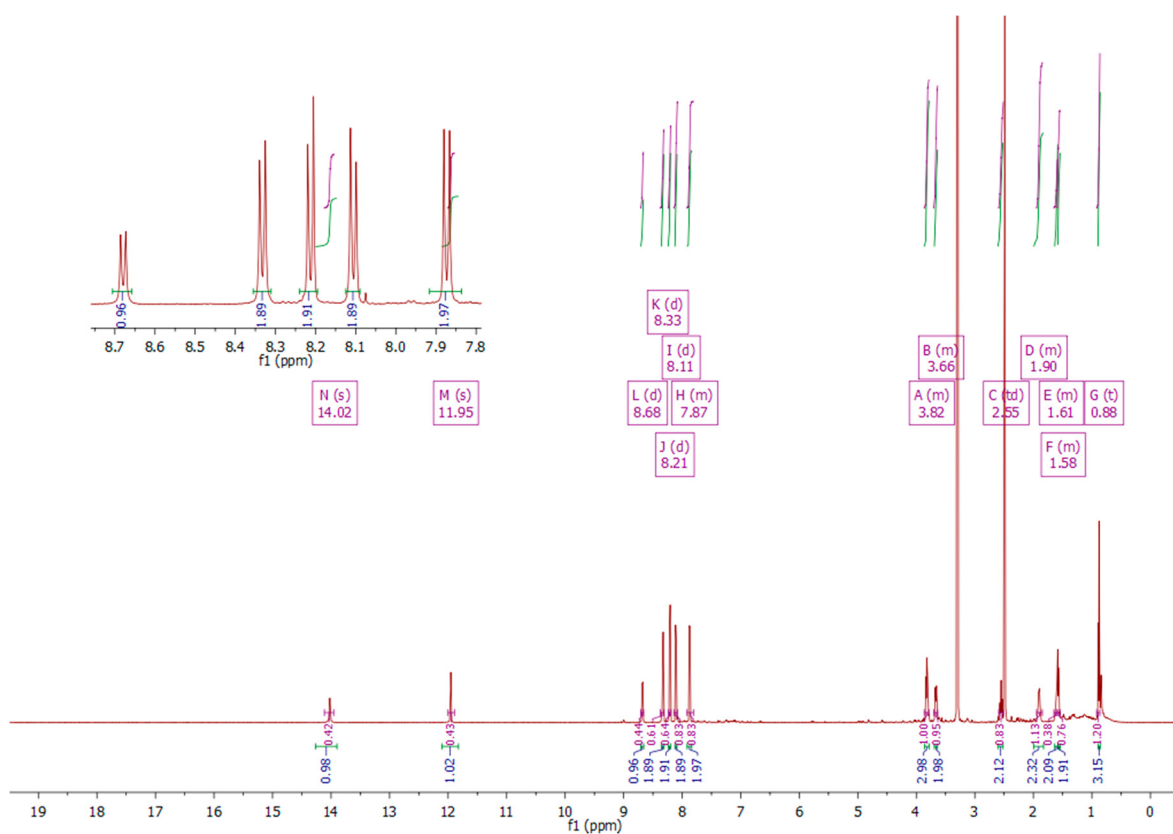

<sup>13</sup>C NMR

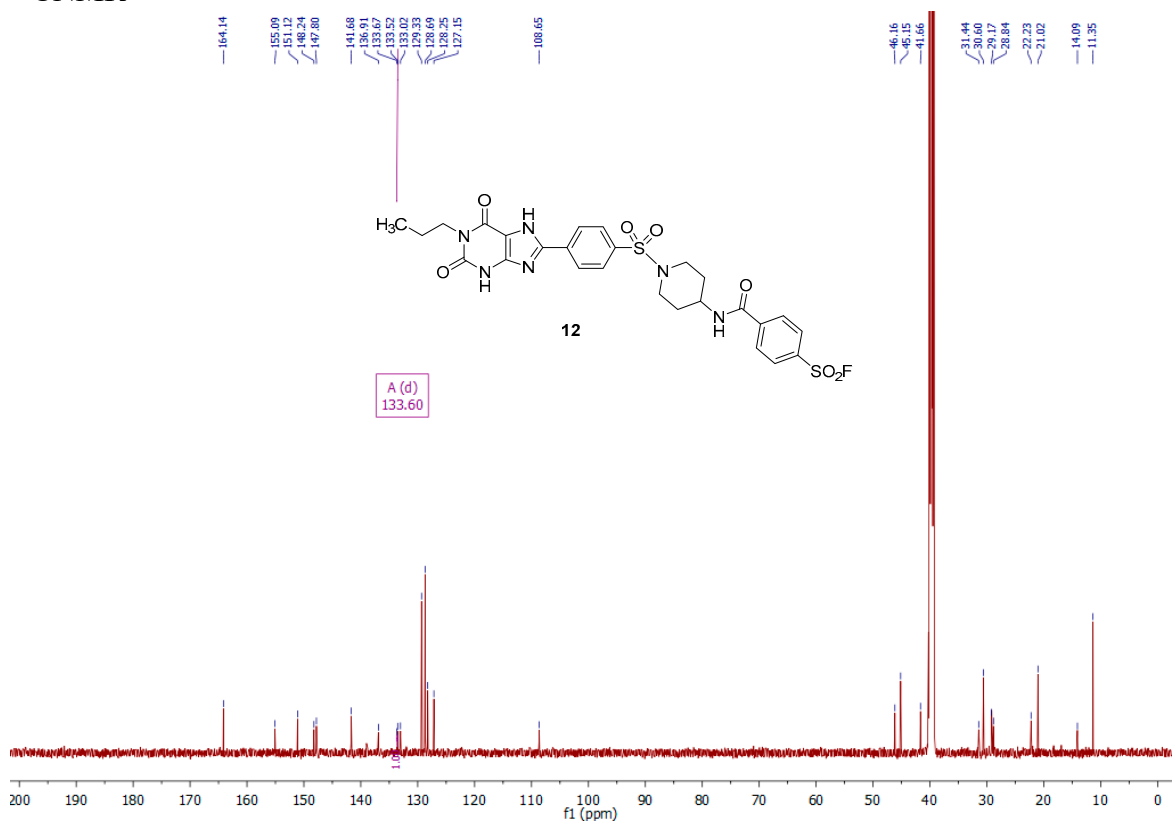

**Figure S4.** <sup>1</sup>H (600 MHz) and <sup>13</sup>C (151 MHz) spectra (DMSO-*d*<sub>6</sub>) of 4-((1-((4-(2,6-dioxo-1-propyl-2,3,6,7-tetrahydro-1H-purin-8-yl)phenyl)sulfonyl)piperidin-4-yl)carbamoyl)benzene-sulfonyl fluoride (12).

Inj. volume: 5.000 Location: P1-F4  
 Acq. method: 0\_wasser-acn\_standard\_100-1000\_AC-20min.amx  
 Processing method: MS\_standard\_plot.pmx

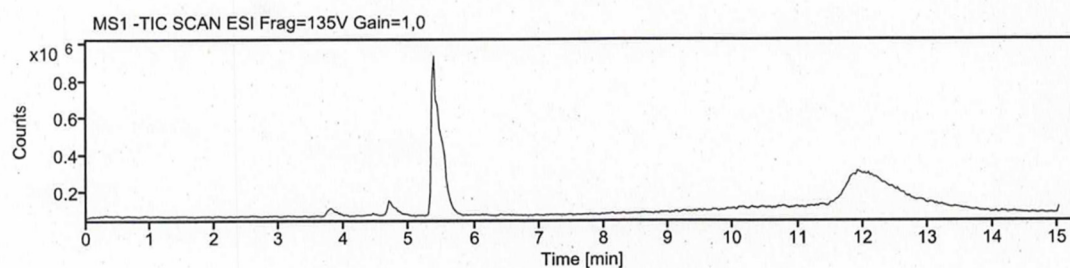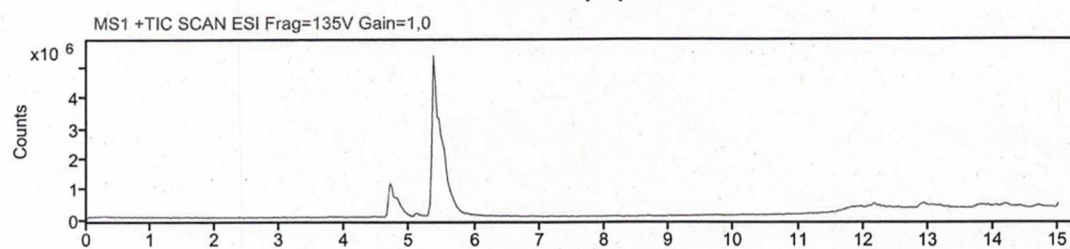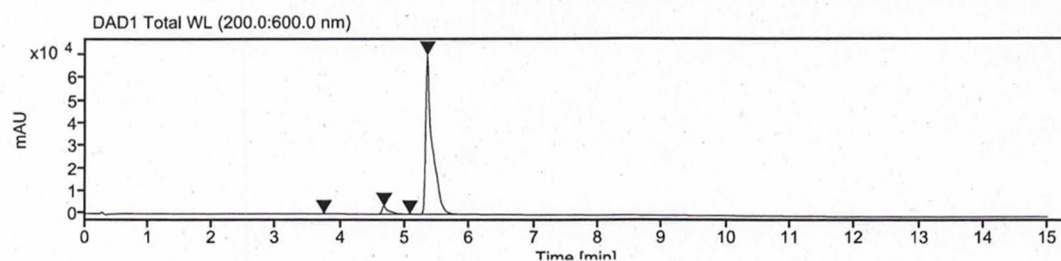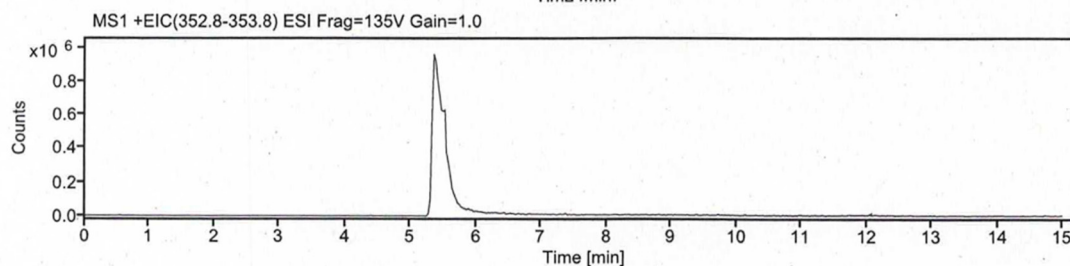

Signal: DAD1 Total WL (200.0:600.0 nm)

| RT [min] | Peak MS Base<br>Peak m/z | Area        | Area%   | Max Peak% | Height    |
|----------|--------------------------|-------------|---------|-----------|-----------|
| 3.738    |                          | 1025.1785   | 0.1960  | 0.206     | 123.720   |
| 4.664    | 729.300                  | 23398.8089  | 4.4746  | 4.697     | 3395.120  |
| 5.071    |                          | 352.4711    | 0.0674  | 0.071     | 83.495    |
| 5.339    | 705.200                  | 498151.6358 | 95.2620 | 100.000   | 69821.129 |
|          | Sum                      | 522928.0943 |         |           |           |

Signal: MS1 +TIC SCAN ESI Frag=135V Gain=1,0

| RT [min] | Peak MS Base<br>Peak m/z | Area          | Area%   | Max Peak% | Height      |
|----------|--------------------------|---------------|---------|-----------|-------------|
| 4.706    | 729.300                  | 9367794.7218  | 14.9699 | 17.605    | 1071947.823 |
| 5.370    | 705.200                  | 53209578.1978 | 85.0301 | 100.000   | 5418473.746 |
| Sum      |                          | 62577372.9196 |         |           |             |

Signal: MS1 -TIC SCAN ESI Frag=135V Gain=1,0

| RT [min] | Peak MS Base<br>Peak m/z | Area         | Area%    | Max Peak% | Height     |
|----------|--------------------------|--------------|----------|-----------|------------|
| 5.373    | 351.200                  | 8434114.0619 | 100.0000 | 100.000   | 868096.908 |
| Sum      |                          | 8434114.0619 |          |           |            |

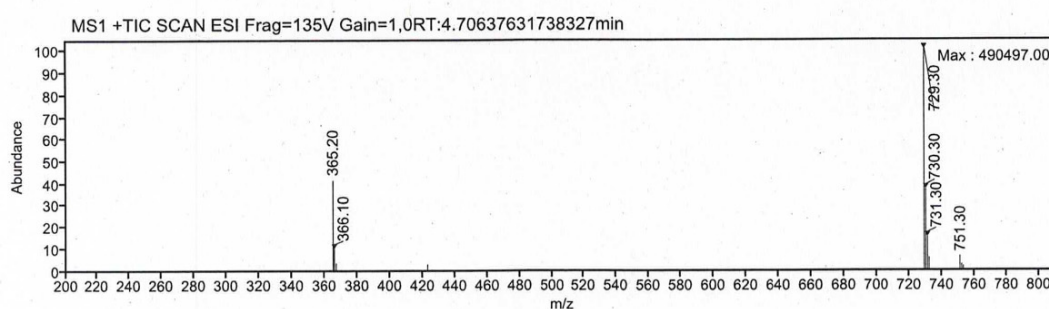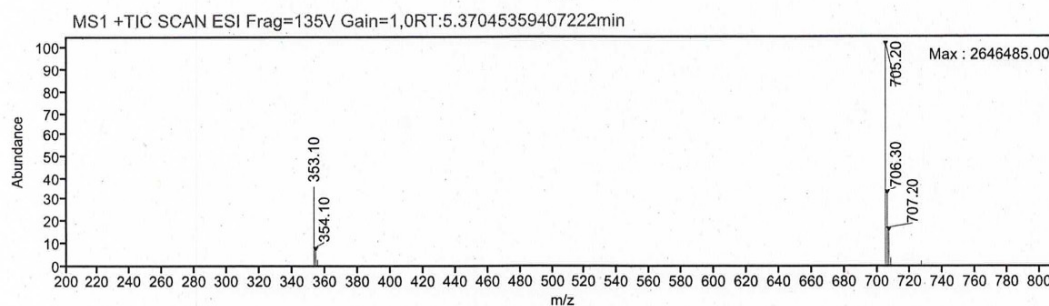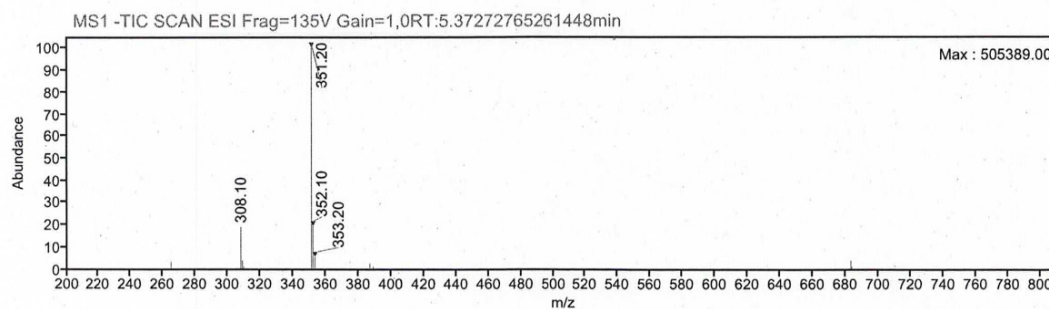

**Figure S5.** LC-MS spectrum of compound **6a**\*

\*The purity of the compound **6a** is 95.26% (retention time: 5.34 min belongs to the desired compound **6a**; also see NMR spectra, **Figure S1**).

**Inj. volume:** 6.000 **Location:** P1-F1  
**Acq. method:** 00-new\_wasser-acn\_standard\_100-1000\_BD-20min.amx  
**Processing method:** MS\_standard\_plot.pm

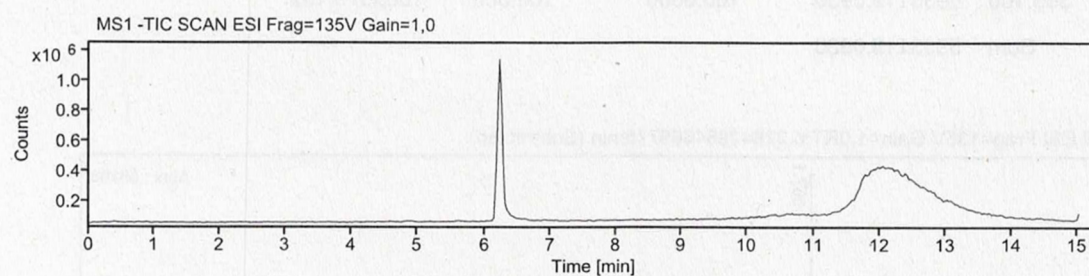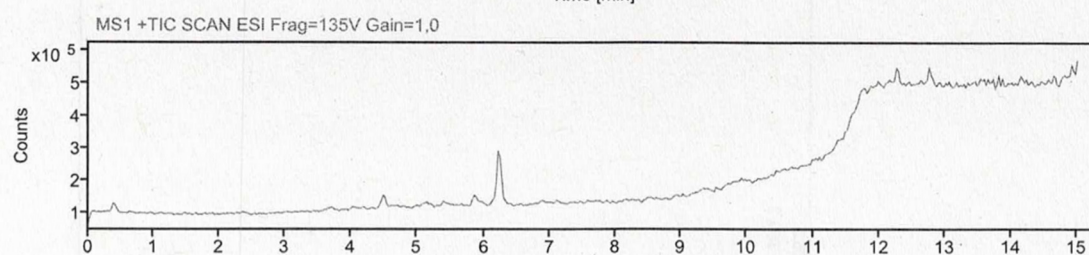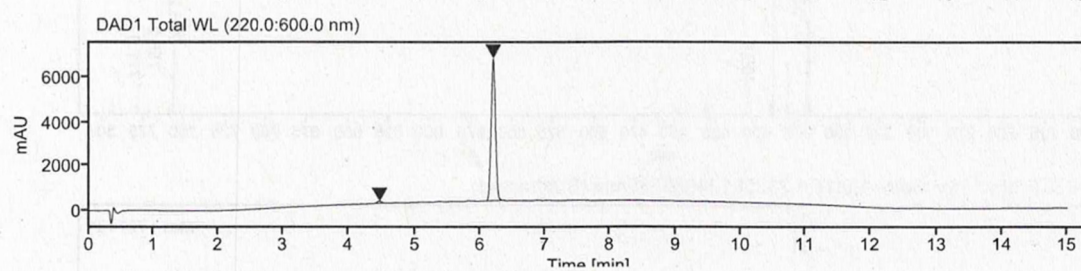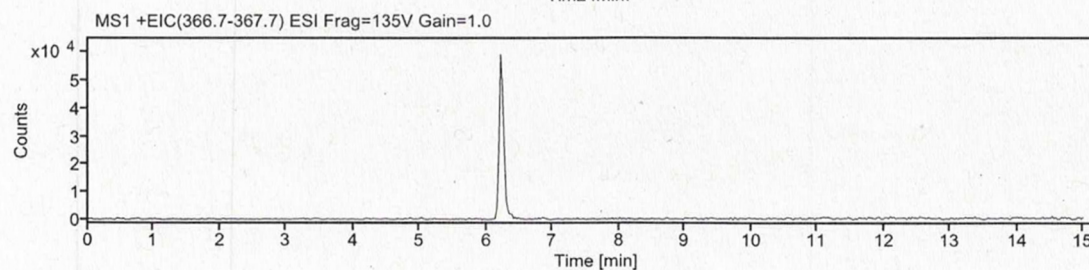

**Signal:** DAD1 Total WL (220.0:600.0 nm)

| RT [min] | Peak MS Base<br>Peak m/z | Area       | Area%   | Max Peak% | Height   |
|----------|--------------------------|------------|---------|-----------|----------|
| 4.459    |                          | 405.3203   | 1.3315  | 1.349     | 91.380   |
| 6.200    | 367.100                  | 30035.0161 | 98.6685 | 100.000   | 6432.036 |
|          | Sum                      | 30440.3363 |         |           |          |

Signal: MS1 +TIC SCAN ESI Frag=135V Gain=1,0

| RT [min] | Peak MS Base<br>Peak m/z | Area         | Area%    | Max Peak% | Height     |
|----------|--------------------------|--------------|----------|-----------|------------|
| 6.228    | 367.100                  | 1113401.2832 | 100.0000 | 100.000   | 184441.225 |
| Sum      |                          | 1113401.2832 |          |           |            |

Signal: MS1 -TIC SCAN ESI Frag=135V Gain=1,0

| RT [min] | Peak MS Base<br>Peak m/z | Area         | Area%    | Max Peak% | Height      |
|----------|--------------------------|--------------|----------|-----------|-------------|
| 6.234    | 365.100                  | 5933119.0930 | 100.0000 | 100.000   | 1063015.152 |
| Sum      |                          | 5933119.0930 |          |           |             |

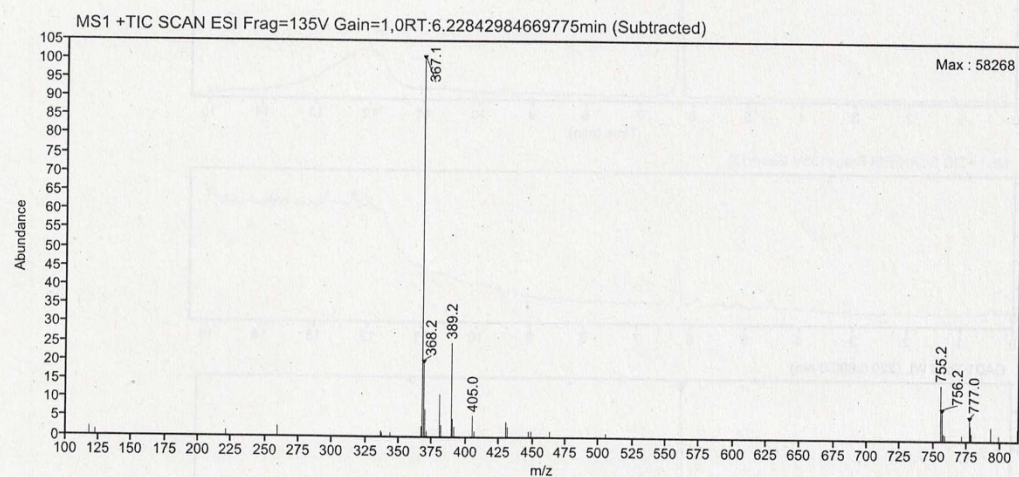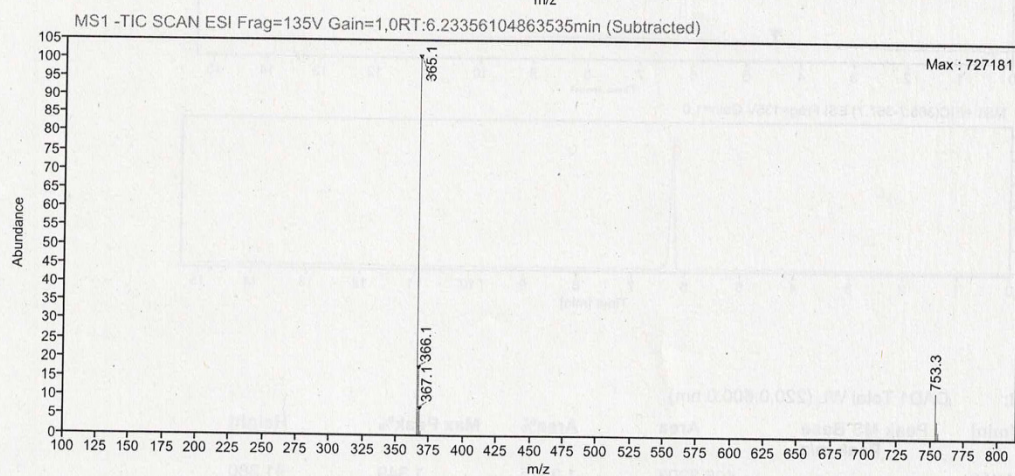

**Figure S6.** LC-MS spectrum of compound **6b**\*

\*The purity of the compound **6b** is 98.67% (retention time: 6.20 min belongs to the desired compound **6b**; also see NMR spectra, **Figure S2**).

**Inj. volume:** 3.000 **Location:** P1-D2  
**Acq. method:** 00-new\_wasser-acn\_standard\_100-1000\_BD-20min.amx  
**Processing method:** MS\_standard\_plot.pmx

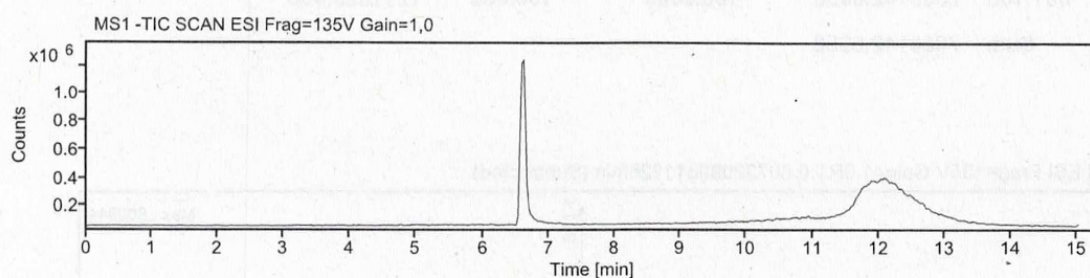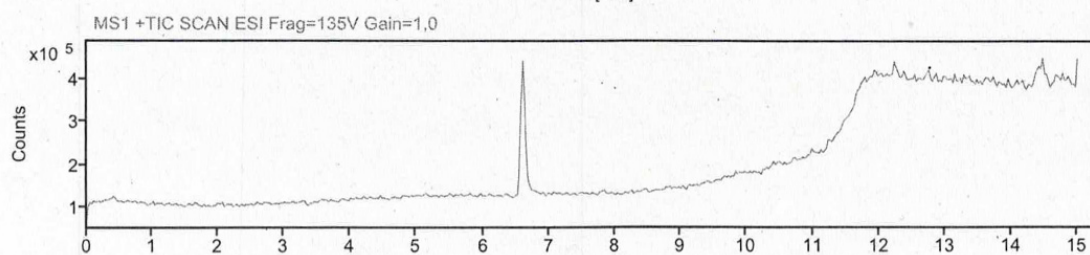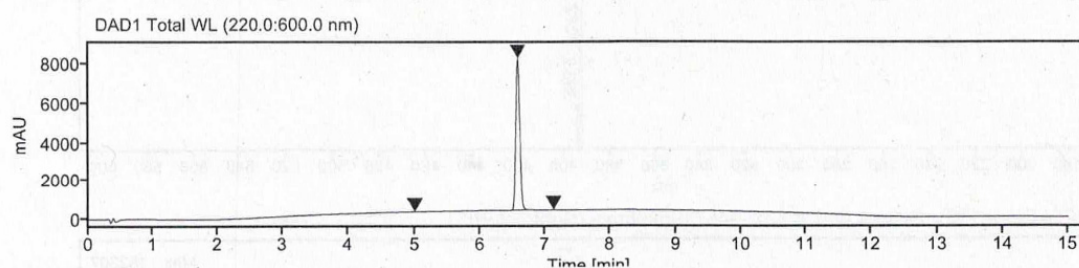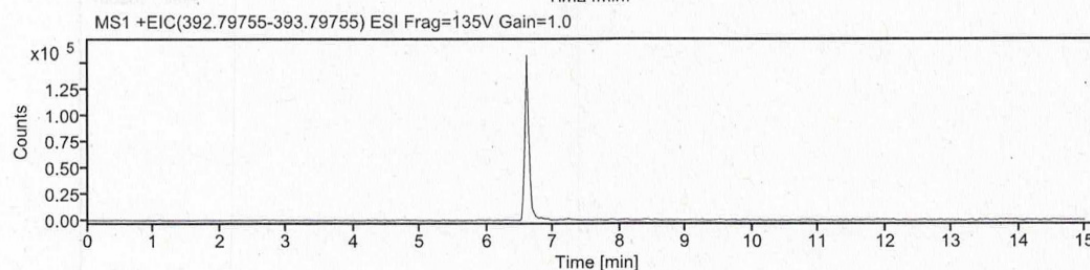

**Signal:** DAD1 Total WL (220.0:600.0 nm)

| RT [min] | Peak MS Base<br>Peak m/z | Area       | Area%   | Max Peak% | Height   |
|----------|--------------------------|------------|---------|-----------|----------|
| 5.004    |                          | 23.2721    | 0.0660  | 0.066     | 5.976    |
| 6.577    | 391.100                  | 35205.6266 | 99.8769 | 100.000   | 7842.946 |
| 7.124    |                          | 20.1052    | 0.0570  | 0.057     | 4.478    |
|          | Sum                      | 35249.0039 |         |           |          |

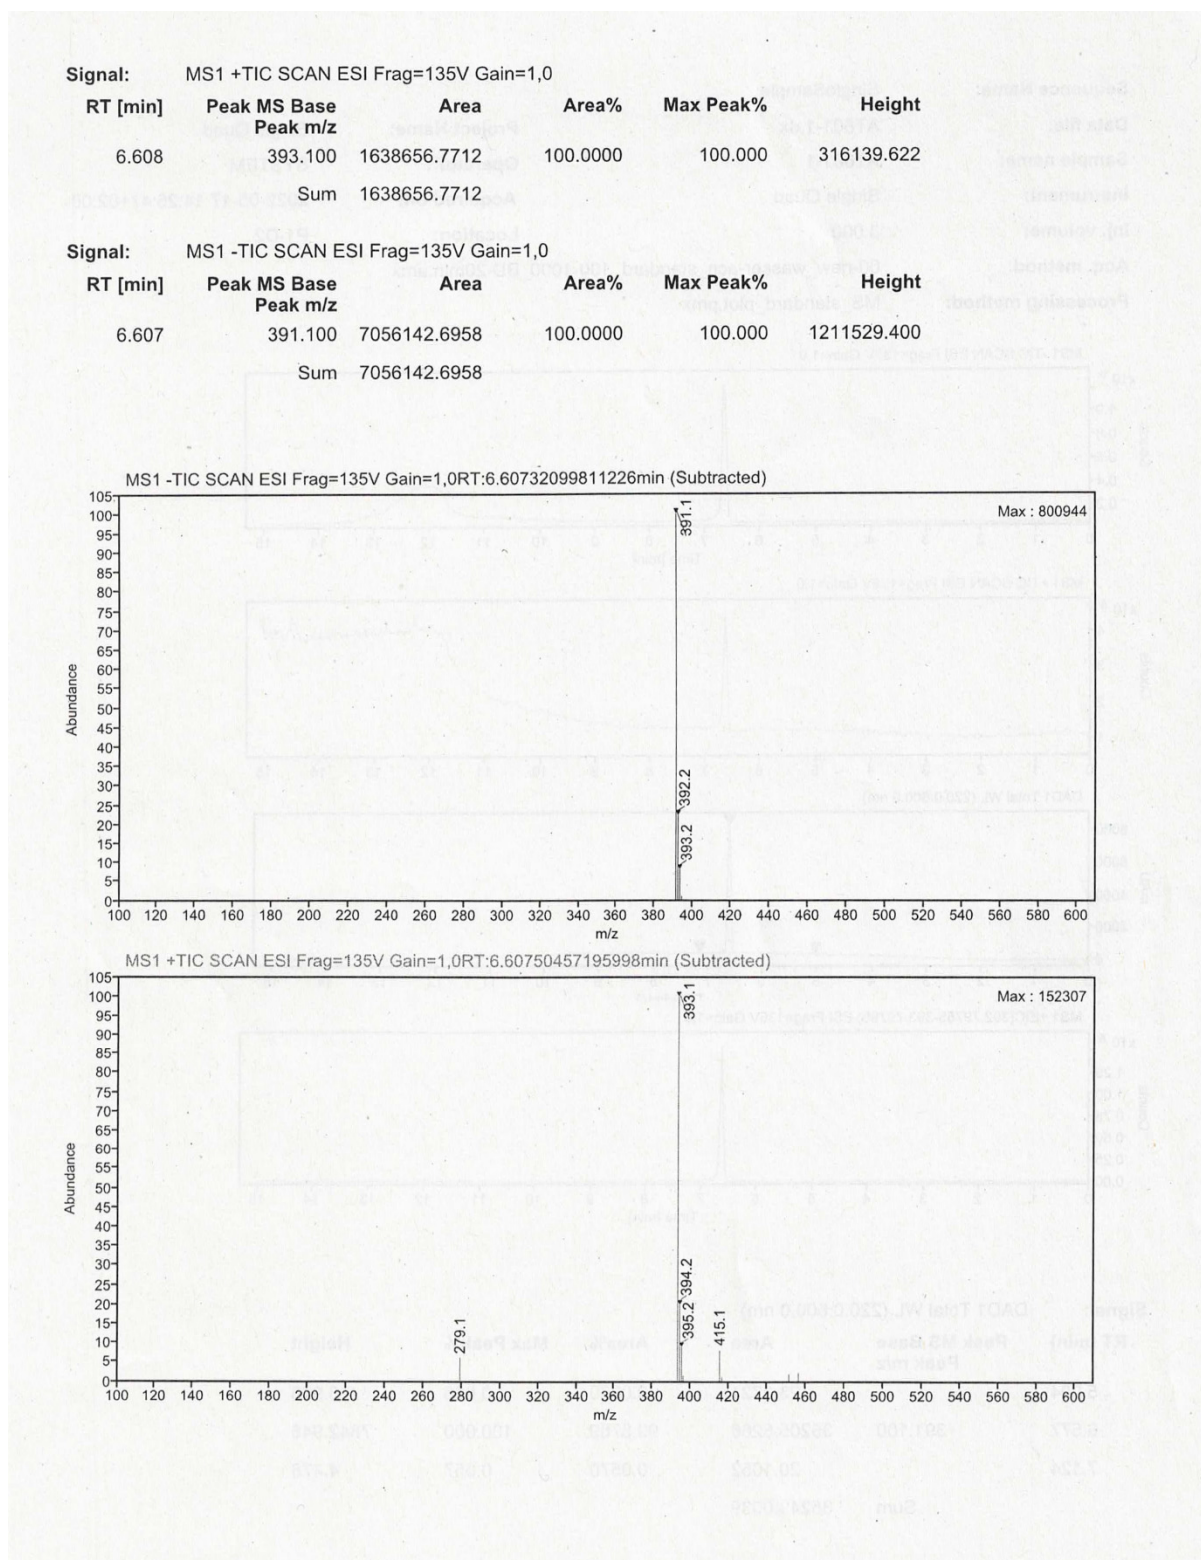

**Figure S7.** LC-MS spectrum of compound **6c**\*

\*The purity of the compound **6c** is 99.88% (retention time: 6.58 min belongs to the desired compound **6c**; also see NMR spectra, **Figure S3**).

**Inj. volume:** 5.000 **Location:** P1-E8  
**Acq. method:** 00-new\_wasser-acn\_standard\_100-1500\_BD-20min.amx  
**Processing method:** MS\_standard\_plot.pmx

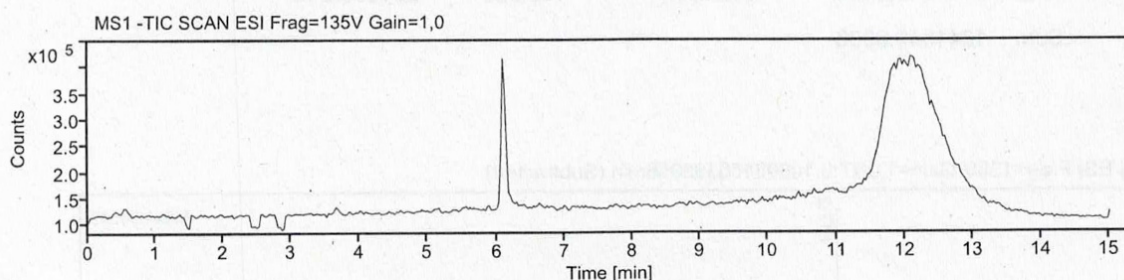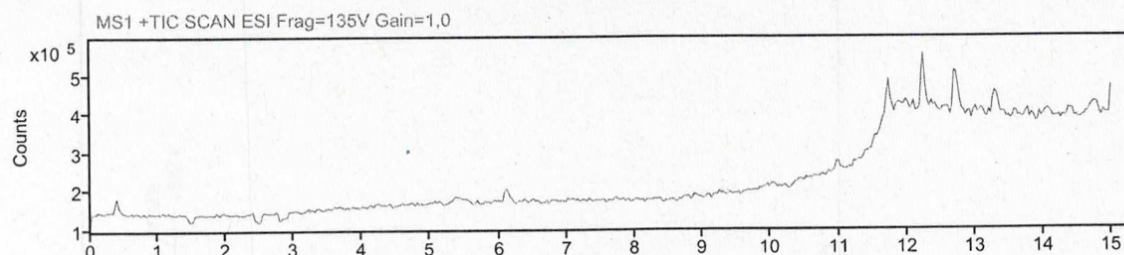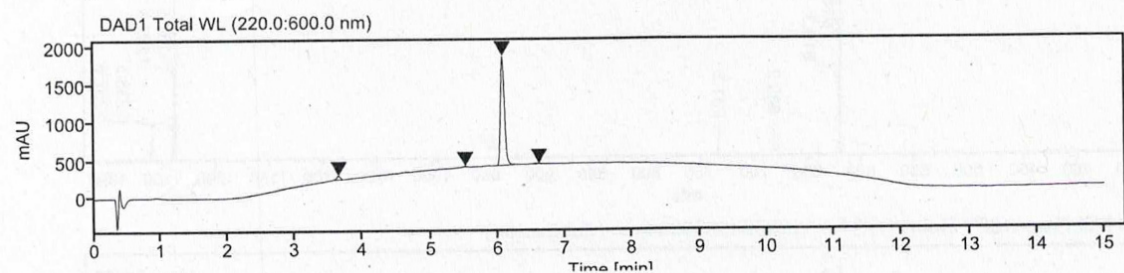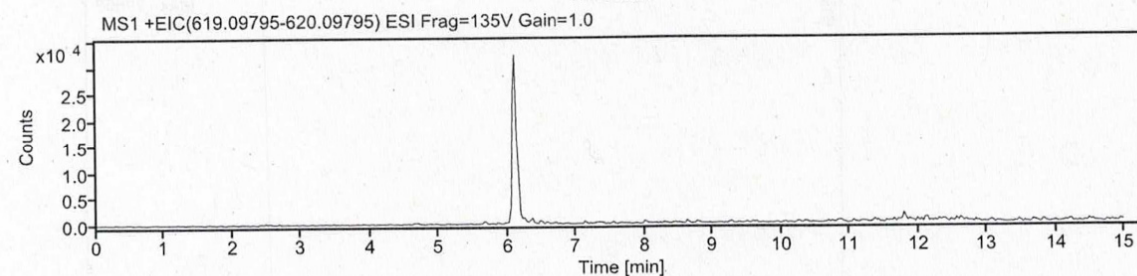

| Signal: DAD1 Total WL (220.0:600.0 nm) |                          |           |         |           |          |  |
|----------------------------------------|--------------------------|-----------|---------|-----------|----------|--|
| RT [min]                               | Peak MS Base<br>Peak m/z | Area      | Area%   | Max Peak% | Height   |  |
| 3.647                                  |                          | 234.1987  | 3.6323  | 3.810     | 58.064   |  |
| 5.518                                  |                          | 17.2680   | 0.2678  | 0.281     | 6.499    |  |
| 6.075                                  | 617.300                  | 6146.1972 | 95.3255 | 100.000   | 1448.974 |  |
| 6.608                                  |                          | 49.9230   | 0.7743  | 0.812     | 6.926    |  |
|                                        | Sum                      | 6447.5869 |         |           |          |  |

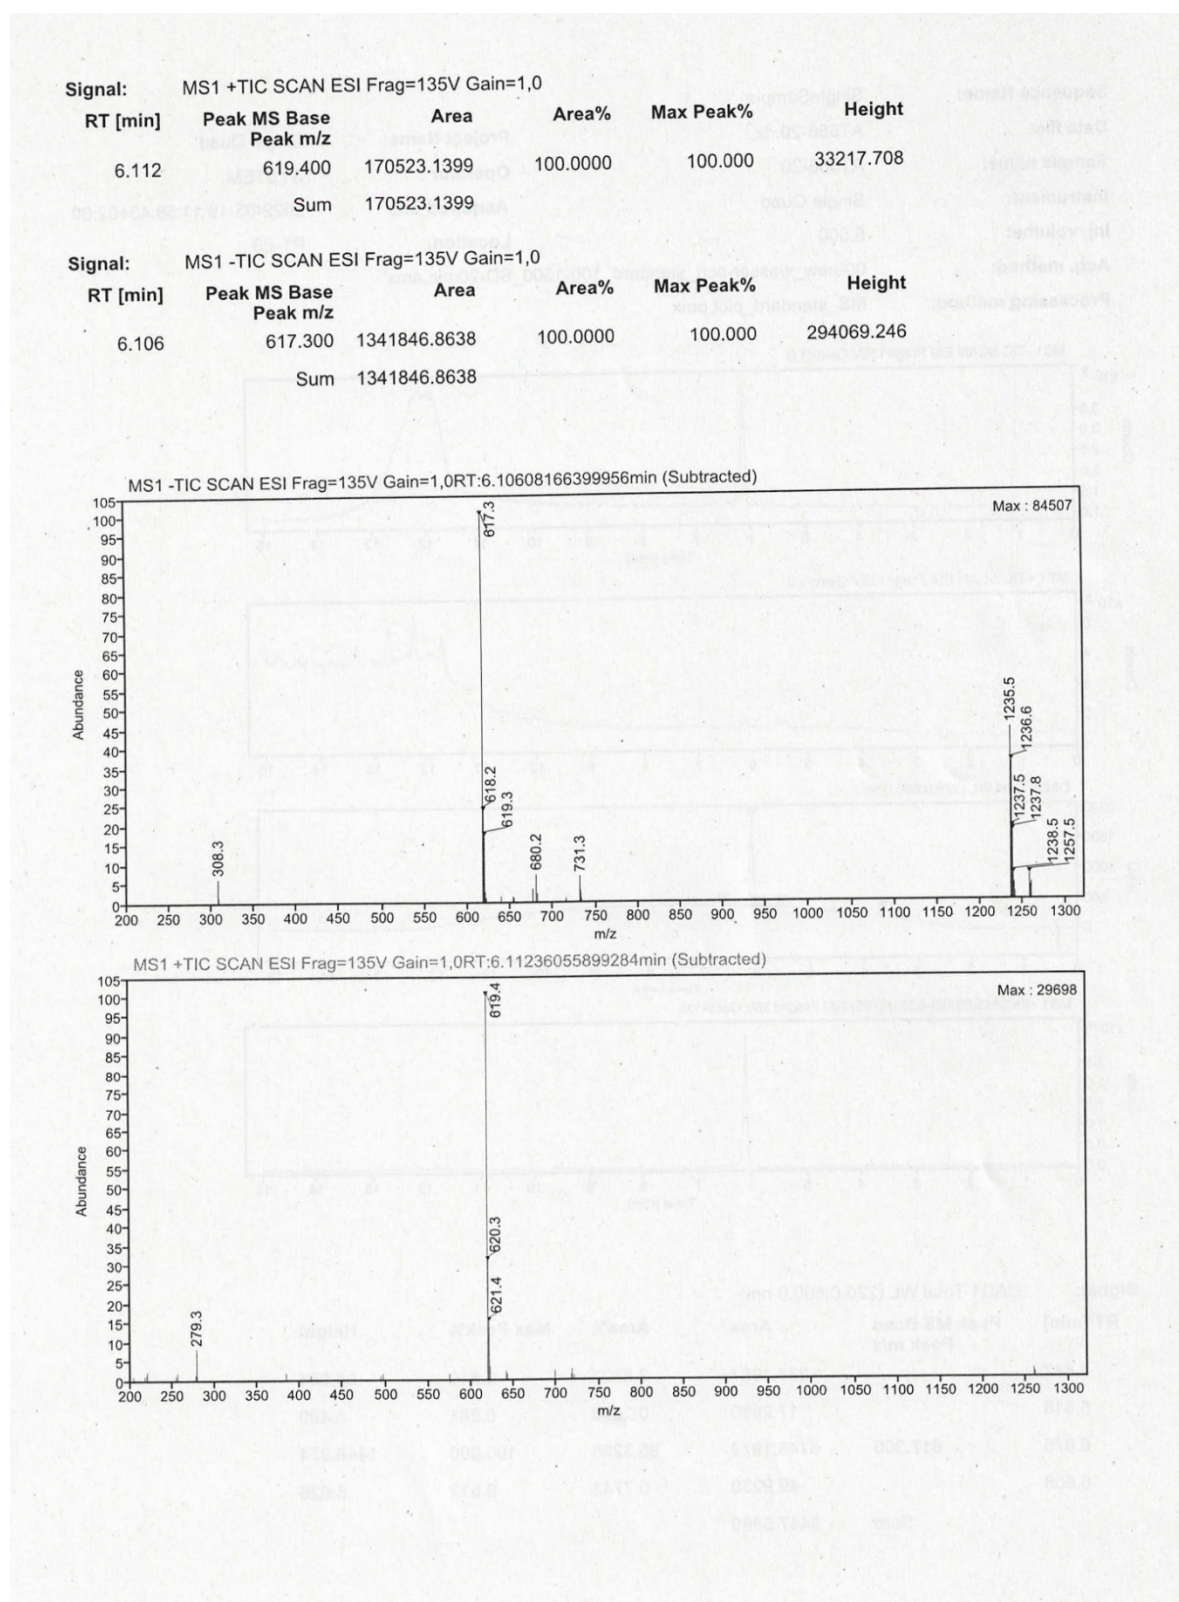

**Figure S8.** LC-MS spectrum of compound **12**\*

\*The purity of the compound **12** is 95.33% (retention time: 6.08 min belongs to the desired compound **12**; also see NMR spectra, **Figure S4**).
